# Supplementary material
Source: PubMed Central journal article supplement (PMC2234205)

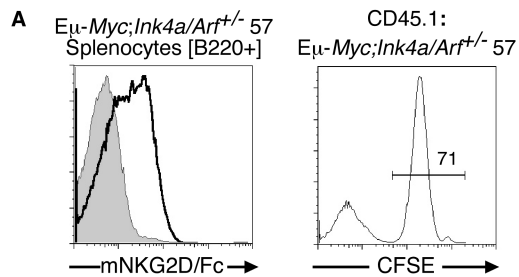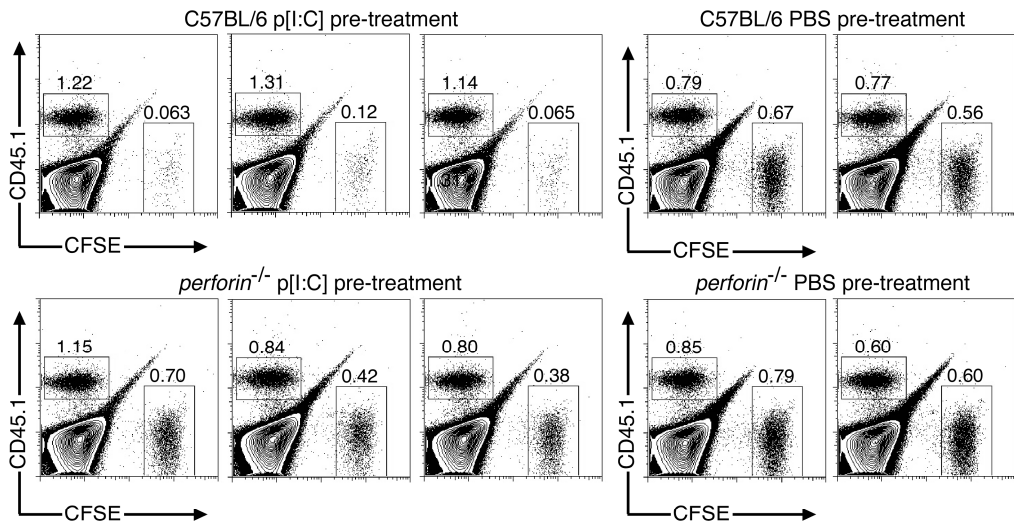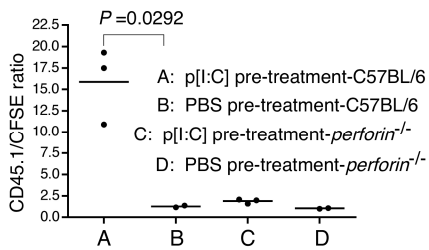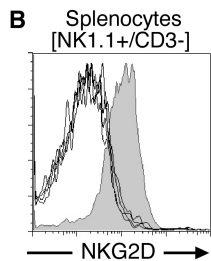

Supplement: pnas_0701675105_1.pdf [file pnas_0701675105_1.pdf]

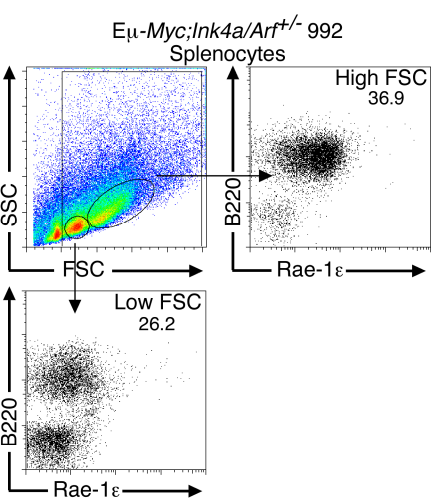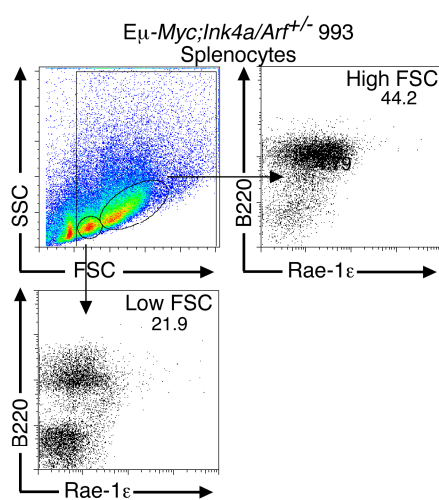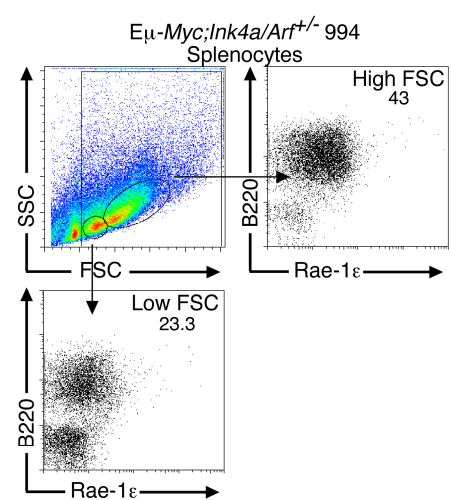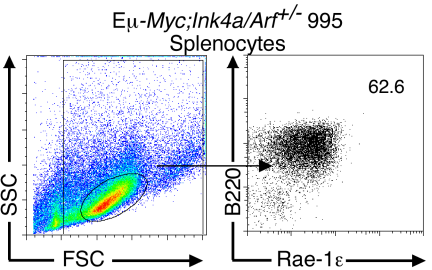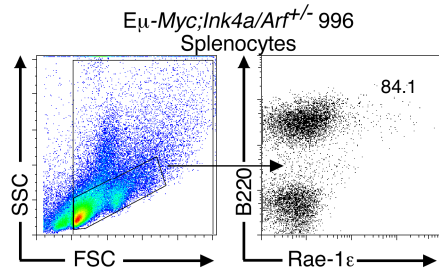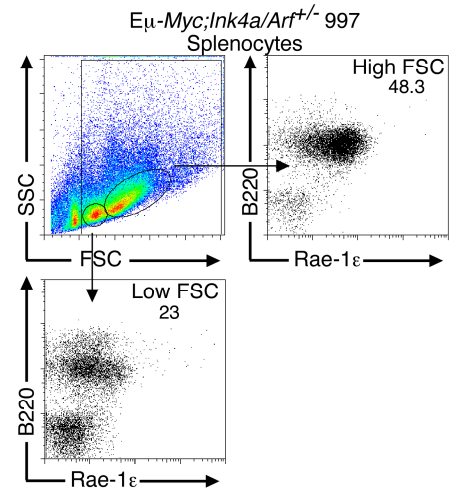

Supplement: pnas_0701675105_2.pdf [file pnas_0701675105_2.pdf]
